# Supplementary material for: Renaming the ‘OS-D/CSP’ family: ‘Lipoid-Binding Proteins’—Molecular Nomenclature, Structure, Expression, Evolution, and Intracellular Functions
Source: Preprints.org preprint supplement (doi:10.20944/preprints202410.0043.v1), 2024-10-01
Supplement: Supplementary file 5 [file supplementary]

1 10 20 30 40 50 60 70 80 90 100 110 120 130  
|-----|  
Mp10 GPAYTTKYDHIIDIDQVLGSKRLVNSYVQCLLDKKPCTPE-GAELRKILPDALKTQCVKCNATQKNAALKYVDRLQRDYDKEWKQLLDKMDPKREYFQKFQQFLAEKKKGYYKF  
Acypi000097 GTAYTTKYDHIIDIDQVLASKRLVNSYVQCLLDKKPCTPE-GAELRKILPDALKTQCAKCNATQKNAALKYVDRLQRDYDKEWKQLLDKMDPKREYFQKFQQFLAEKKKGYYKF  
BonnoCSP10 MPKYDERYDYLDDIFRNKRLVRNYYDCLINAQRCCTPE-GKALKRILPEALRTKCICTERQKRTSVKYIRRLKNEYPEEMAKLASRWDPDGTTRYFEDYLAKEHFNTIPGSGPTVNVLSLQTTTPPP  
HelzePAN1 MPKYDSRYDYLDDAVFVFNKRLVRNYYDCLINAQRCCTPE-GKALKRILPEALRTKCICTERQKRTAVKYIKRLKNEYPDEHAKLASRWDPDGTTRYFEEFLAKEQFNTIPGSAIGSEIPT-SSPLAP  
Acypi000094 TSSYPTRYDFIDIEAVHMNERIIKILFNVCVMNQGPCTRE-GLELKRIYPDAIQTECAKCNDRQKQAGKYLAHLLQYKPEYWMHLVKKFDPNNVYLRKYHADNDDDEKLSLQKLTNNTTK  
BonnoCSP4 TSTYTTQYDEYDIKEIHGNERLLVAYIGCLLDKNPCTPE-GKELKRNIPDALQSDCSKCSQKQRENADAWIEFHMIDNRPEDMTKLEERYNPDGSYRTKYLEGKHNATSNVDESK  
Acypi000096 EEKYTTKFDNFDDYDKVLLNDRILLTSYIKCLLDQGNCTNE-GRELKKVLPDALKTDCSKCTAYQKDRSEKYIKFLIKNRSKDFDNLTAKYDPSGEYKKKIEKFDAERAAAAKH  
Acypi000095 QEKYSTKYENFDVYDKVLLNDSLLTSYINCLLDQGNCTNE-GQALKRILPDALKTNCGKCTDAQKLLKIEIKMKFLIKNRSIDFDRLTAKYDPSGEYKKKLEKFS  
Pedhu594660 PQKYSTKYDNIDIDISILKNDRLLESHVNCCLLDKGPCTKE-GQDFKDYLPEDIDTSCCKCTVAQKRIYKKAAYLMEKKKPAWEQIRNKYDPMNEHTKDFNKFMEPIE  
Acypi009116 PAKYTTKYDNVYIDILNNDRLVASYFKCLMETGKCTPE-GEEIKRMLPEAVENKCEDCEKQKIGSEKIIFLFEKNDMMKQLEEKYDPKGLYRQRYSEDARKLNIDY  
Pedhu594430 DEKYSTKYDNIDILDSILKNDRLLNQYVNCCLLDKGTCTPE-GTDLKKVLPDALENACAKCSEAQRGAEKYIRHLLNKKDVFLLERAKYDPPNGVYRKKYEAERAKRIQL  
Pedhu594540 PTKFTTKFDDYNLDEILKSERLLKNYFDCLLMDTKPCTPD-GTELKKSLLPYALKEECAGCSEKQRYGAETVIHYISNNKPELWKALDQKYDPEQVYRTKHADFRAKKGIKY  
BonnoCSP14 ESTYTDKNONINVDIEILSNRLLKGYYVDCLLGKGRCPTD-GKALKETLPDALEHECVKCTGKQKSGADKYIRHLVNRKPDLMKELAVKYDPPNIYQARYKDKIDAVKGSA  
XP028028218Thap1 ESTYTDKNONINVDIEILSNRLLKGYYVDCLLERGRCTPD-GKALKETLPDALEHECVKCTGKQKSGADKYIRHLVNRKPDLMKELAVKYDPPNIYQARYKDKIDAVKGSA  
BonnoCSP1 DDKYTDKYDKINLQEIENKRLLESYMDCVLGGKCTPE-GKELKDHLEALETGCEKCTEAQEKGAETSIDYLIKNELEIMKELTAHFDPDGKWRKKYEDRAKAKGIVIE  
BonnoCSP8 DDKYTDKYDNVNLDEVLNSRLLQPYIKCILDKRCAPD-AKELKEHIREALETECAKCTEAQKKGTRRVIGHLINNESKSWNELTAKYDPPENKFTAKYEKELREIKA  
BonnoCSP9 PEQYTDKYDVTDLQGLISNRLLIPYVHCILEKGQCTAE-GKELKSHIKALETNCACKTKAQKGGTEKNIGHLINHEAEFWEELKAKYDPTNEFTKKYETELKRYTA  
BacanHP256881044 SSTYTDKYDNINIDEILSNKRLTPYIKCHLDEIKCSTE-GKELKSHIKDALENECIKCTDAQKSGTRKYIGHLINKEPEYMSQLTKKYDPPKQHYSSQYKEL  
BonnoCSP7 ISSYSTRYEHINLDDVLYNNRLLKNYTKCHIGTGRCCTAE-ANKLKAYFPDMLETCKSKCTPQKKKIKKAVTFLMKHKPEMUEGLLDKYDPPKRELSKMDLTDPNFLGKI  
XP028025219Thap1 AGSYSDRYDNINVAEILGNKRLLTAYIKCVLEEGKCTAE-GKELKSHITDALQTGCTKCTGAQRKGIRRVIKHLIDSEPGYWDRLVDMYDPPKRYVTGKYKELRTIKA  
BonnoCSP6 AEKYTDKYDNIDVDEILENRKLLVPYIKCVLDEGRCTPD-GKELKAHIKDGHTACAKCTDKQKYSARKIYVHIKQHEADYWEQMKAKYDPPKDEFKEIYEGFLAGQN  
BonnoCSP7 IARPKTPFDNINIEEIFENRRLLLGYNICILERGNCTRA-GKDLKSSLLKNVLEENCDCSEQKRSIIVINYLYSSEPESHQKSKYDPEGKYLIKYEAKMESN  
Pedhu594550 EEEYSSQYDNFDVEQLVGNLRLKNYAKCFLDQGPCTAE-GTEFKRILPEALRTKCAKCNPKQRHLIRTVYKAFQTKLPDLWEELAIKEDPKGQYKQEFATFINATD  
XP028029186Thap1 EEEYSSQYDNFDVEQLVGNLRLKNYAKCFLDQGPCTAE-GTEFKRILPEALRTKCAKCNPKQRHLIRTVYKAFQTKLPDLWEELAIKEDPKGQYKQEFATFINATD  
BonnoCSP13 DLFYDQKYDNFNVDEIIDNPRLLKAYTFCFNDKGKCTAE-GNDFKKMIPESLQSCGKSEKQKYLVAKFVHAIKDKHPDEFDILRKLHDPKGEYTENLDKFLETYGH  
BonnoCSP3 LAADLSKYENFDVEPIVTSORLLKAYINCFLDQGPCTAE-ASDFKKALPDITATNCGKCTEQKANVRKYIKVIQKHSSTEMEKLVKKHDPGSKHRRADFDFLLGS  
XP012549336Thap1 IACYDEKYDKIDVDKILSDDKLFTDYINCMLDQGPCTEVEYSSEFKELLPEVIATSCAKCTPIQKTGLRKYKALSVKRPDDFSQFRAKYDPPKGEYKQFAAFVYATD  
BonnoCSP20 KQYYDSRYDYYDIDHLVQNPRLKKYLLDCLGKGPCTPI-GRFLKQVMPVEVITACAKCTPIQKRFARKTFNAFRRYFPETLHMLRKFDPESKYDADFVKVITNA  
Acypi002311 LKKFLSTLEKIDIDQILNMHRLMSNNVYKCFLENGPCTAQ-LREMKMLPALVKDSCASCCTKEQKNIKKSMERAIQARRPNEYKQVSKFFDPEGKYQKKFLENLNTD  
BonnoCSP17 RQQSYPRNDNININAILQNDRIILGYFKCYMDRGPCTKD-GKTFKRALPEALPTACARCSNKQKAAFRITLLAIRARSEPSFLELLDKYDPPSRNRELLYTFLATGL  
XP030028674Thap1 TQQNYPRNENININAILQNDRIILGYFKCYMDRGPCTKD-GKTFKRALPEALPTACARCSNKQKAAFRITLLAIRARSEPSFLELLDKYDPPSRNRELLYTFLATGL  
OIC81003 QDKYEPIDDSFDASEVLSNERLLKSYTKCLLNQGPCTAE-LKKIKDKIPEALETHCAKCTDKQKQMAKQLAQGICKTHPELWDEFITFYDPEGKYQTSFKDFLES  
BonnoCSP2 QDKYEPIDDSFDASEVLSNERLLKSYTKCLLNQGPCTAE-LKKIKDKIPEALETHCAKCTDKQKQMAKQLAQGICKTHPELWDEFITFYDPEGKYQTSFKDFLES  
OIC85870 QDKYEPIDDSFDASEVLSNERLLKSYTKCLLNQGPCTAE-LKKIKDKIPEALETHCAKCTDKQKQMAKQLAQ  
Acypi000345 SGYYLSTYDNLDVGHLLRNKKVYSGFVKCFVNEGRCPTDGLKYKAYLLPEIIRTVCCKCTPRQKDMSRAYLRHLTYTYRRADFQKIMQIYDTONKNKEINFHMQK  
BonnoCSP12 KETYSSENDDLIEALVGNISLKAFIGCFLETSPCDAY-SDGFKKDIPAEVAEACGKCTPAQKHLFKRFLEVYVKDLPEQEYAEFTKYDPPQGHFDFALLSAVANS  
KlepnHP159189367 GEHYTDORYDNVLDIEILSNKKVLENYVVKCILDQGKCTPD-GTELKGHIKDALETECAKCNERQKDGTRRHGHEHYT  
Acypi005842 KDSSLPNVSEDVLDKALSDRRFVQRQLKATGEGPCDPT-GRKIKAHAPLVLRGMVYKCSQSEIKQIQRVMSHIQKNYPKEYTKMLKQYQSGF  
BonnoCSP19 AQQNRPQVTDALDEALNDKRFIQRQLKALGEAPCDPT-GKRLKTLAPLVLRGACPCQSPQETKQIQKTLISYVQRNFPQHMAKLVYQYAG  
Acypi003368 EDDDKPDFITTFDLIRLLDEKYAMKQFYCVINEDPCDSV-GHRLKATIPEEINRDCERCATETNNIRRLNLYVKKHYPKFERVEPIYRDKMTVLTANIVYKIQ  
BonnoCSP16 AHITDALQTGCTKCTGAQRKGIRRVIKHLIDSEPGYWDRLVDMYDPPKRYVTGKYKELRTIKA  
BonnoCSP18 LLPEVIATSCAKCTPIQKTGLRKYKALSVKRPDDFSQFRAKYDPPKGEYKQFAAFVYATD  
BonnoCSP5  
Consensus AGSYSDRYDNINVAEILGNKRLLTAYIKCVLEEGKCTAE-GKELK  
...y...yd..d.d..l.n.rll..y..C.l..gpCt.e g..lk...p.al.t.C.kCt..#k....k....l....p..w..l..kydp...y.....

131 140 150 160 170 180 190 200 210 220 230 240 250 260  
|-----|  
Mp10  
Acypi000097  
BonnoCSP10  
HelzePAN1  
Acypi000094  
BonnoCSP4  
Acypi000096  
Acypi000095  
Pedhu594660  
Acypi009116  
Pedhu594430  
Pedhu594540  
BonnoCSP14  
XP028028218Thap1  
BonnoCSP1  
BonnoCSP8  
BonnoCSP9  
BacanHP256881044  
XP028025219Thap1  
BonnoCSP6  
BonnoCSP7  
Pedhu594550  
BonnoCSP15  
BonnoCSP11  
XP028029186Thap1  
BonnoCSP13  
BonnoCSP3  
XP012549336Thap1  
BonnoCSP20  
Acypi002311  
BonnoCSP17  
XP030028674Thap1  
OIC81003  
BonnoCSP2  
OIC85870  
Acypi000345  
BonnoCSP12  
KlepnHP159189367  
Acypi005842  
BonnoCSP19  
Acypi003368  
BonnoCSP16  
BonnoCSP18  
BonnoCSP5  
Consensus

261 270  
|-----|  
Mp10  
Acypi000097  
BonnoCSP10  
HelzePAN1  
Acypi000094  
BonnoCSP4  
Acypi000096  
Acypi000095  
Pedhu594660  
Acypi009116  
Pedhu594430  
Pedhu594540  
BonnoCSP14  
XP028028218Thap1  
BonnoCSP1  
BonnoCSP8  
BonnoCSP9  
BacanHP256881044  
XP028025219Thap1  
BonnoCSP6  
BonnoCSP7  
Pedhu594550  
BonnoCSP15  
BonnoCSP11  
XP028029186Thap1  
BonnoCSP13  
BonnoCSP3  
XP012549336Thap1  
BonnoCSP20  
Acypi002311  
BonnoCSP17  
XP030028674Thap1  
OIC81003  
BonnoCSP2  
OIC85870  
Acypi000345  
BonnoCSP12  
KlepnHP159189367  
Acypi005842  
BonnoCSP19  
Acypi003368  
BonnoCSP16  
BonnoCSP18  
BonnoCSP5  
Consensus
