# Supplementary material for: Renaming the ‘OS-D/CSP’ family: ‘Lipoid-Binding Proteins’—Molecular Nomenclature, Structure, Expression, Evolution, and Intracellular Functions
Source: Preprints.org preprint supplement (doi:10.20944/preprints202410.0043.v1), 2024-10-01
Supplement: Supplementary file 11 [file supplementary]

1 10 20 30 40 50 60 70 80 90 100 110 120 130  
|-----+-----+-----+-----+-----+-----+-----+-----+-----+-----+-----+-----+-----+  
Mp10 MFSTQSQAMDSRIAYVCYVLAVFAYDQTVGAPQKDAYAASGPAYTTKYDHIDIDQVLGSKRLVNSYVQCLLDKKPCTPEGAELRKILPDALKTQCYKCNATQKNAAALKVVDRLQRDYDKEWKQLLDKWDP  
ACYPI000097 MDSRIAYVCYVLAVFAYDQTVGAPQKDAYAASGTAYTTKYDHIDIDQVLASKRLVNSYVQCLLDKKPCTPEGAELRKILPDALKTQCAKCNATQKNAAALKVVDRLQRDYDKEWKQLLDKWDP  
BPHOGS10008228 MYVPYRVGYSLCLADDQYTSKYDNIDLKILDSKRLVSNYVQCLLGTKGCPPEGLELKRILPDALKTQCSKCTCVQRQGAVKAIQRLQKDYPDEWKL LLDKWDA  
BPHOGS10002786 MSNYIICKVLLYSVSYSLSLCLADDQYTSKYDNIDLKILDSKRLVSNYVQCLLGTKGCPPEGLELKRILPDALKTQCSKCTCVQRQGAVKAIQRLQKDYPDEWKL LLDKWDA  
AAJJ0269C MIPLIAIAGILAYSAPAFAEFYESRYDHLDESILNRRHMVNYAACLLSGPCPPQGVDLKRYLPEARLTNCAKCTEKQRTAAYRSIKRLKKEYPKIEWEQLRAYWDP  
AAJJ0269B MIKKRFRFIPYHDFVNGKTLHRSTRDDKYTRYDNVDYDRILHSKRLLLNYINCLLEKGPCSPEGRELKKILPDALVTNCSKCSEVQKKQAGKITFTVLLNRYNEWNQLVAKYDP  
DP0006842 MHCASYFFVYSALLYLISAQSSPYTSKYDNVDYDKILKNDRLTNHYIKCLMEEGPCTPEGRELKRTL PDALASGCSKCNEKQKSTTEKVIIRHLQTRRAKDWDRLSKKYDP  
XP\_012166268 MRTEETAQVVCYTAEITYTKYDNVDYDRILQNGRILTNYIKCHLDEGPCTNEGRELKKILPDALSTGCSKCNEKQKHTANKVYNYLRTRKPKDWERLSAKYDS  
HMELO10990 MKTVLC--LFALVAVACALPSSTYTDKYDNIDLDEL SNKRLLTPLYVKCHLDEGKCSPEGKELKSHVREALENECSKCTENQKAGSRKVIGHLINNEQEYWSKLTAKYDP  
CSUOGS107535 MKAIILIGLSVVYTIAWARPGNTYTDKWDHINYDEILES NRLLKGYYDCLLERGRCTPDGKALKETLPDALEHECSKCTEKQKTASDKVIRHLYNKRPDLWTELAAKYDP  
Bta06193 MNLLSVVYLVCCLFAYLSAPAEFYTSQFDNIDIESILNNEKLLDNYFKCLMDEGPCTLEGRTLKSLVPDALNTSCAKCTDKQKQIARRVITFYLDKYPANSARIK KYDP  
PVENScaf20457 KLFYLAFLATAATYVLAVPAPAYTTKYDNVNIDEILGNDR LF-----LPDALENDCKGCSEKQKEGAERI IKHLIDNKPDMWTKLEEKYDK  
Consensus .....a.p...YT.k%N!#. #. IL.n.Rll..y..c ll..gpc.peg.elk..lp#AL.t.CskC.ekQk..a.kv!..l...yp..W..L..KyDp

|                |               |      |     |
|----------------|---------------|------|-----|
|                | 261           | 270  | 274 |
|                | -----+        | ---- |     |
| Mp10           |               |      |     |
| ACYP1000097    |               |      |     |
| BPH0GS10008228 |               |      |     |
| BPH0GS10002786 |               |      |     |
| AAJJ0269C      | TKLANMVISAIRP |      |     |
| AAJJ0269B      |               |      |     |
| DP0006842      |               |      |     |
| XP_012166268   |               |      |     |
| HME1010990     |               |      |     |
| CSU0GS107535   |               |      |     |
| Bta06193       |               |      |     |
| PVENscaf20457  |               |      |     |
| Consensus      |               |      |     |
