# Supplementary figures and images for: Renaming the ‘OS-D/CSP’ family: ‘Lipoid-Binding Proteins’—Molecular Nomenclature, Structure, Expression, Evolution, and Intracellular Functions
Source: Preprints.org preprint supplement (doi:10.20944/preprints202410.0043.v1), 2024-10-01

**A.**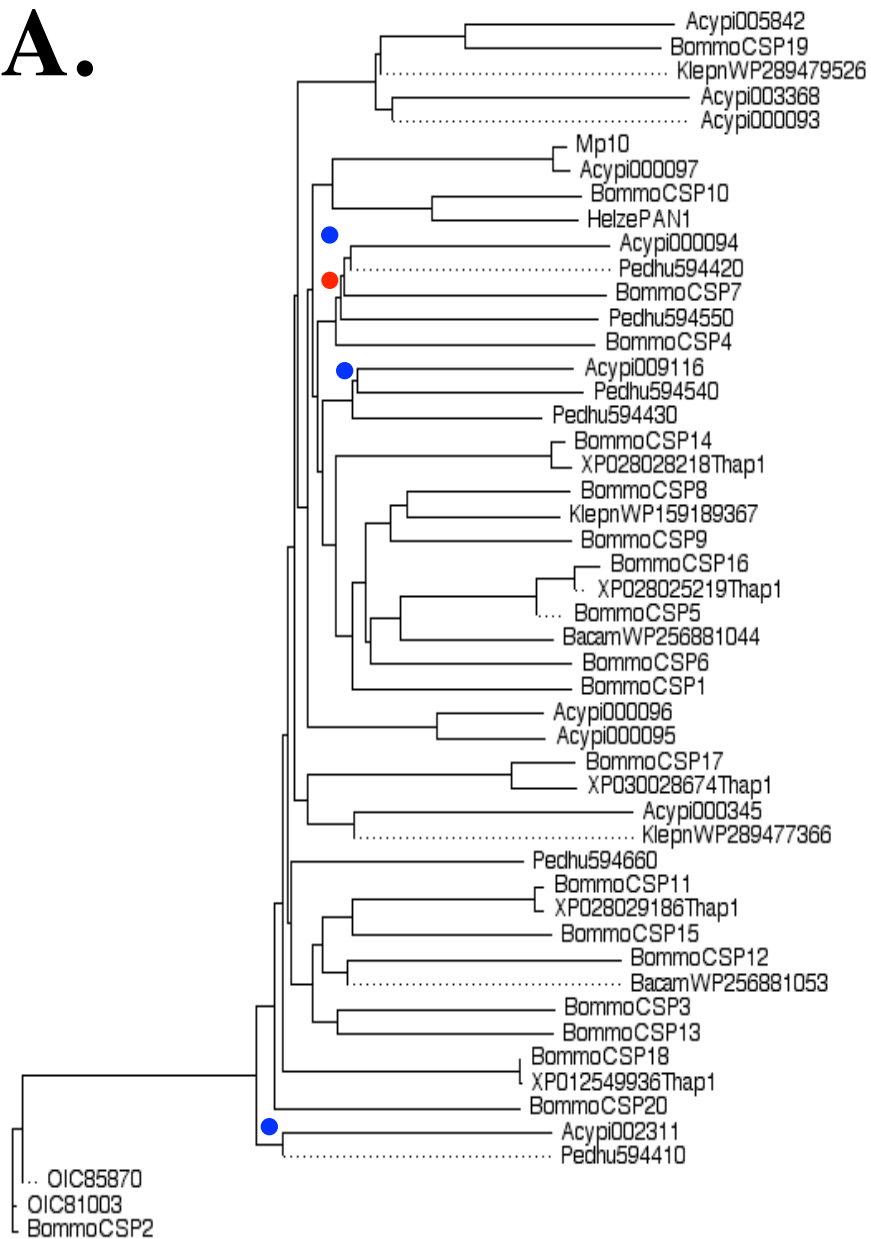

0.05 changes

**B.**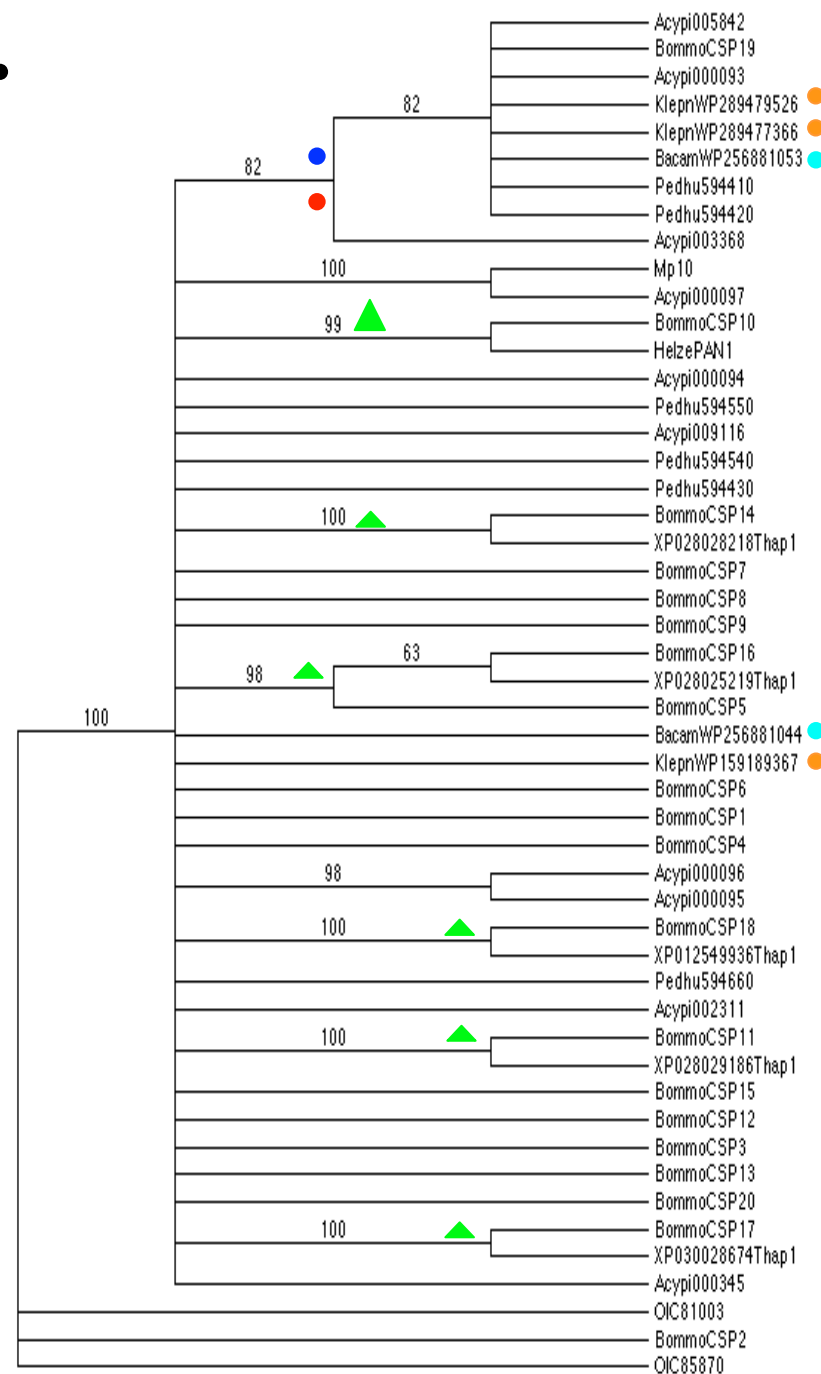

Supplement: Supplementary file 2 [file supplementary]

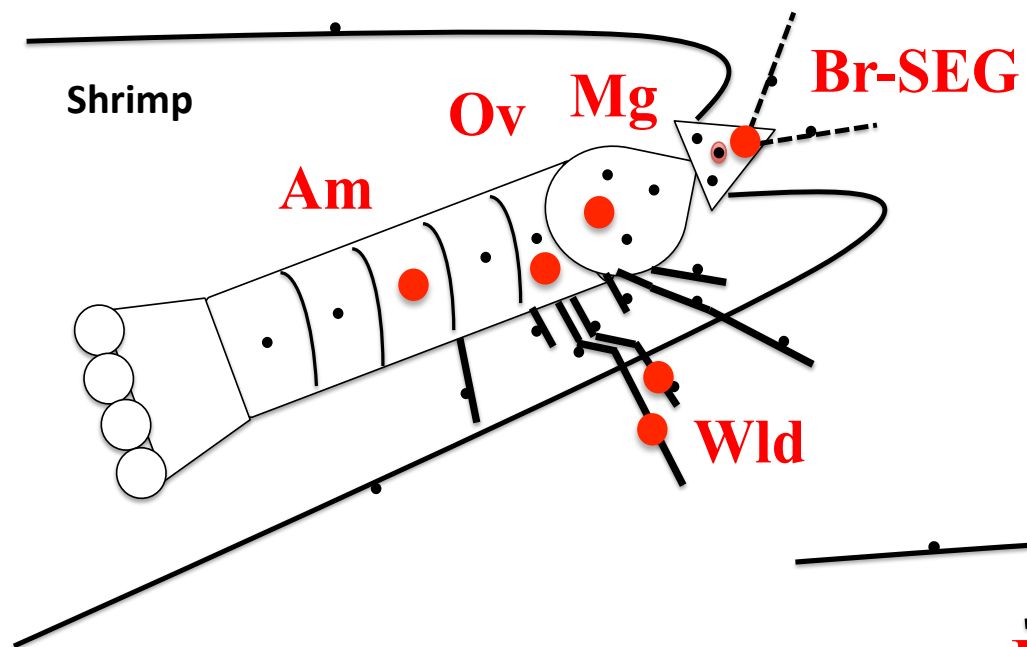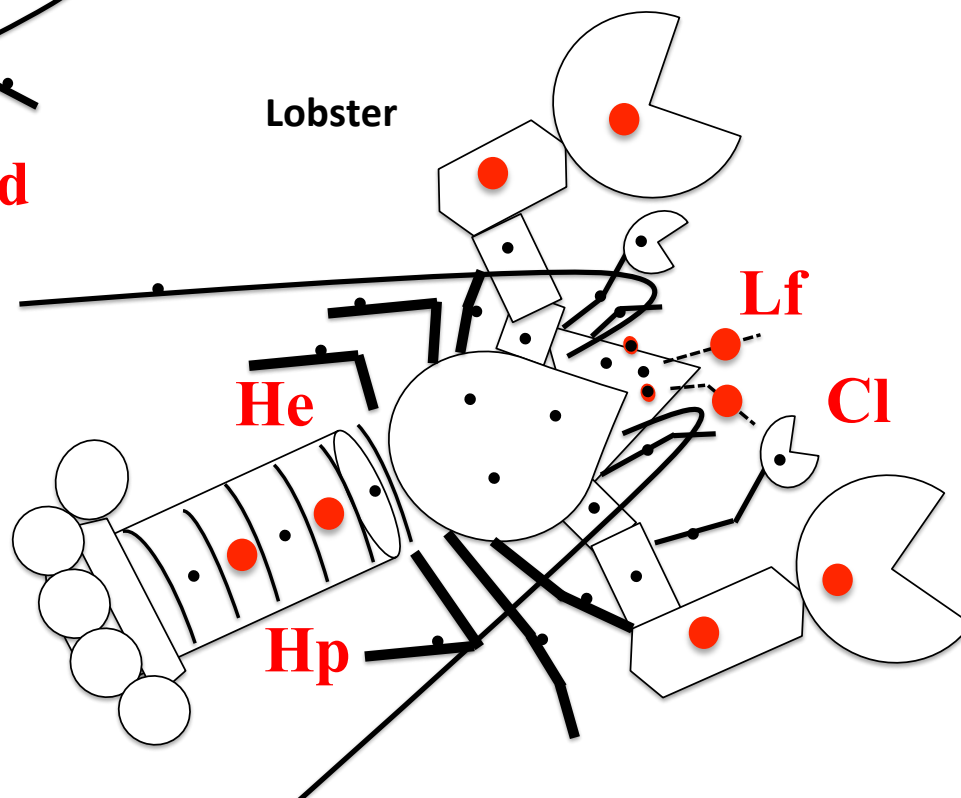

Supplement: Supplementary file 12 [file supplementary]

**A.**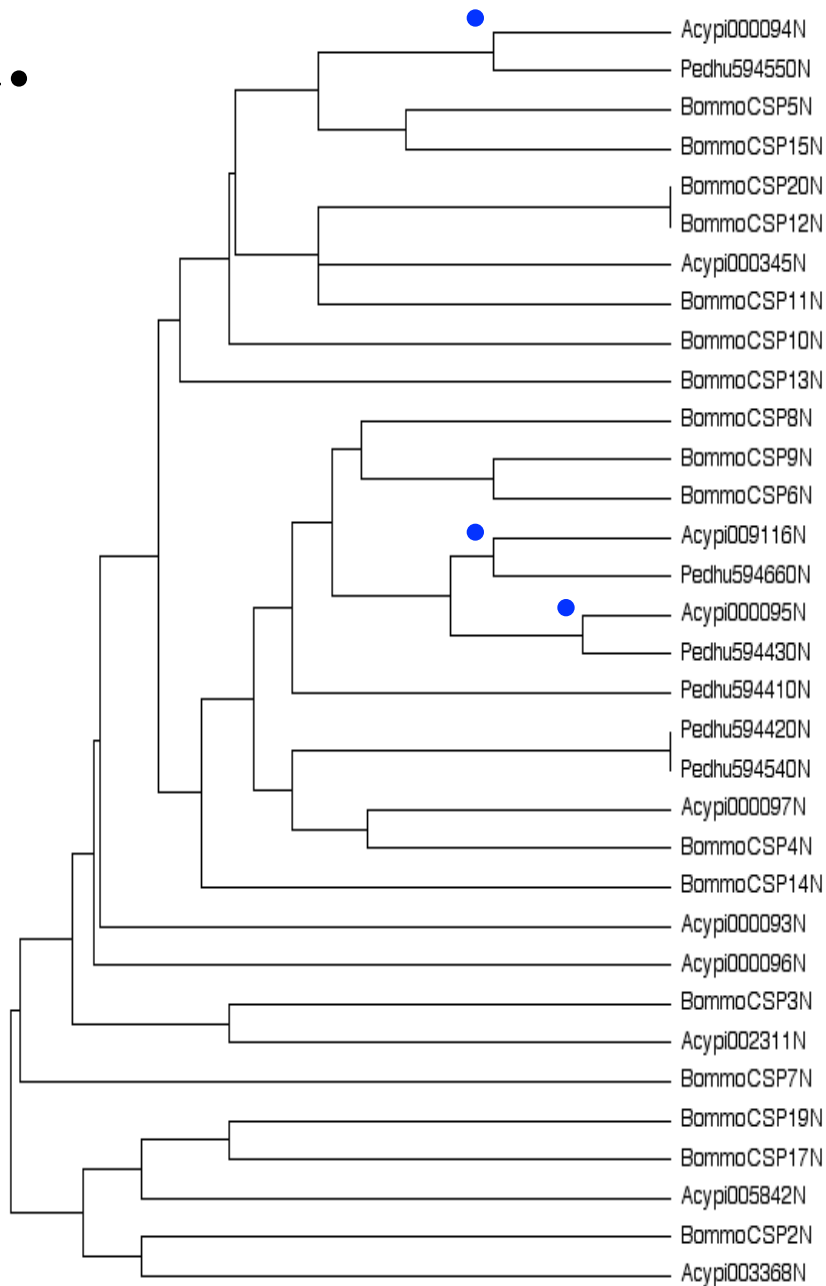

0.1 changes

**B.**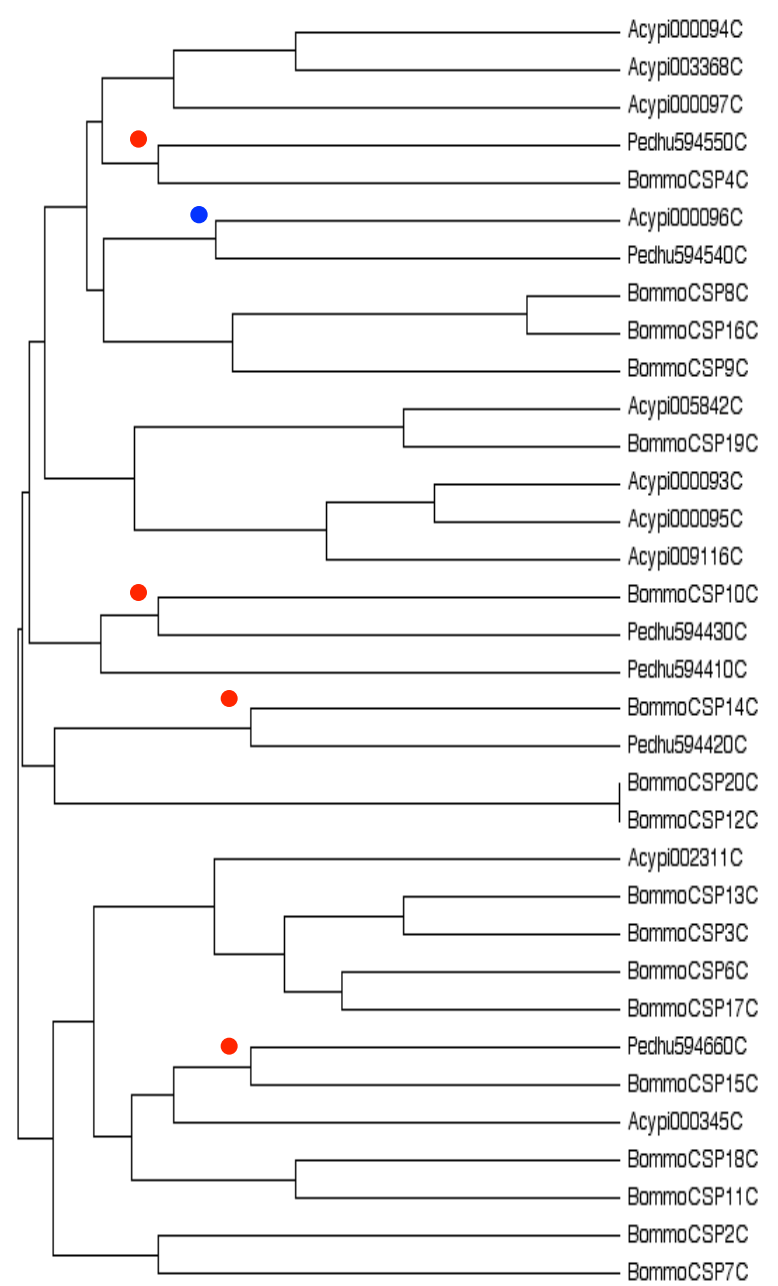

0.1 changes

Supplement: Supplementary file 13 [file supplementary]
